# Supplementary material for: Bottleneck Removal of Paclitaxel Biosynthetic Pathway By Overexpression of DBTNBT Gene Under Methyl- β- Cyclodextrin and Coronatine Elicitation in Taxus Baccata L.
Source: Research Square preprint supplement (doi:10.21203/rs.3.rs-1032537/v1), 2021-11-12
Supplement: Supplementary file 1 [file b9211cd109239fc24c38435a.docx]

**Inoculation with *Agrobacterium* harboring pCAMBIA1304-*DBTNBT* vector**

**Control groups**

**Elicitation of inoculated leaves**

- **No inoculation**
- **Elicitation with methyl- β- cyclodextrin and coronatine**

**Compared to**

**Methyl- β- cyclodextrin**

**Coronatine**

- **Inoculation with *Agrobacterium* harboring pCAMBIA1304 vector**
- **No elicitation**
- **No inoculation**
- **No elicitation**

**The presence of *DBTNBT* transgene affects the expression level of *ABC* and *BAPT* genes the most and led to 7.4-fold more paclitaxel production than the no-inoculation/no-elicitation control in *Taxus* *baccata* L.**
